# Supplementary material for: Poly(dimethylsiloxane) (PDMS) surface patterning by biocompatible photo-crosslinking block copolymers
Source: Royal Society of Chemistry journal article supplement (doi:10.1039/c5ra08843g), 2015-01-01
Supplement: c5ra08843g1.pdf [file c5ra08843g1.pdf]

## Electronic supplementary information (ESI)

### **Poly(dimethylsiloxane) (PDMS) surface patterning by biocompatible photo-crosslinking block copolymers<sup>†</sup>**

Keita Kuroda,<sup>a</sup> Hiromi Miyoshi,<sup>b</sup> Shota Fujii,<sup>c</sup> Tomoyasu Hirai,<sup>c</sup> Atsushi Takahara,<sup>c,d</sup>  
Aiko Nakao,<sup>e</sup> Yasuhiko Iwasaki,<sup>f</sup> Kenichi Morigaki,<sup>g</sup> Kazuhiko Ishihara<sup>h</sup> and Shin-ichi  
Yusa<sup>\*a</sup>

<sup>a</sup>*Department of Materials Science and Chemistry, University of Hyogo, 2167 Shosha, Himeji, Hyogo 671-2280, Japan. E-mail: yusa@eng.u-hyogo.ac.jp; Fax: +81-79-267-4954; Tel: +81-79-266-8868*

<sup>b</sup>*RIKEN Center for Advanced Photonics, RIKEN, 2-1 Hirosawa, Wako, Saitama 351-0198, Japan*

<sup>c</sup>*Graduate School of Engineering, Kyushu University, 744 Motooka, Nishi-ku, Fukuoka 819-0395, Japan*

<sup>d</sup>*Institute for Materials Chemistry and Engineering, Kyushu University, 744 Motooka, Nishi-ku, Fukuoka 819-0395, Japan*

<sup>e</sup>*Nishina Center for Accelerator-Based Science Nuclear Spectroscopy Laboratory, RIKEN, 2-1 Hirosawa, Wako, Saitama 351-0198, Japan*

<sup>f</sup>*Faculty of Chemistry, Materials and Bioengineering, University of Kansai, 3-3-35*

*Yamate, Suita, Osaka 564-8660, Japan*

<sup>g</sup>*Research Center for Environmental Genomics, University of Kobe, 1-1*

*Rokkodai, Nada, Kobe 657-8501, Japan*

<sup>h</sup>*School of Engineering, The University of Tokyo, 7-3-1 Hongo, Bunkyo-ku, Tokyo 113-*

*8656, Japan*

### **Synthesis of PMPC<sub>120</sub>.**

MPC (10.0 g, 33.9 mmol), CPD (79.2 mg, 0.28 mmol), and V-501 (39.6 mg, 0.14 mmol) were dissolved in a mixture of methanol and water (33.9 mL, 9/1 = v/v). The solution was deoxygenated with Ar gas for 30 min. The solution was stirred at 70 °C for 4 h. After polymerization, the solution was dialyzed against pure water for 3 days. The resulting polymer (PMPC<sub>120</sub>) was recovered using freeze-drying (10.0 g, 99.0%). Number-average molecular weight ( $M_n$ (NMR)) and degree of polymerization (DP) were  $3.57 \times 10^4$  and 120, respectively, estimated from <sup>1</sup>H NMR. Molecular weight distribution ( $M_w/M_n$ ) was 1.16, estimated from gel-permeation chromatography (GPC).

**Table S1** Surface elemental compositions from XPS and calculation

|    | Bare PDMS XPS (%) | Bare PDMS Calculated (%) | Polymer-coated PDMS XPS (%) | Polymer-coated PDMS Calculated (%) |
|----|-------------------|--------------------------|-----------------------------|------------------------------------|
| C  | 50.24             | 50.00                    | 59.30                       | 65.47                              |
| N  | -                 | -                        | 1.16                        | 3.37                               |
| O  | 25.09             | 25.00                    | 24.25                       | 23.11                              |
| P  | -                 | -                        | 1.75                        | 3.37                               |
| Si | 24.66             | 25.00                    | 13.55                       | 4.38                               |

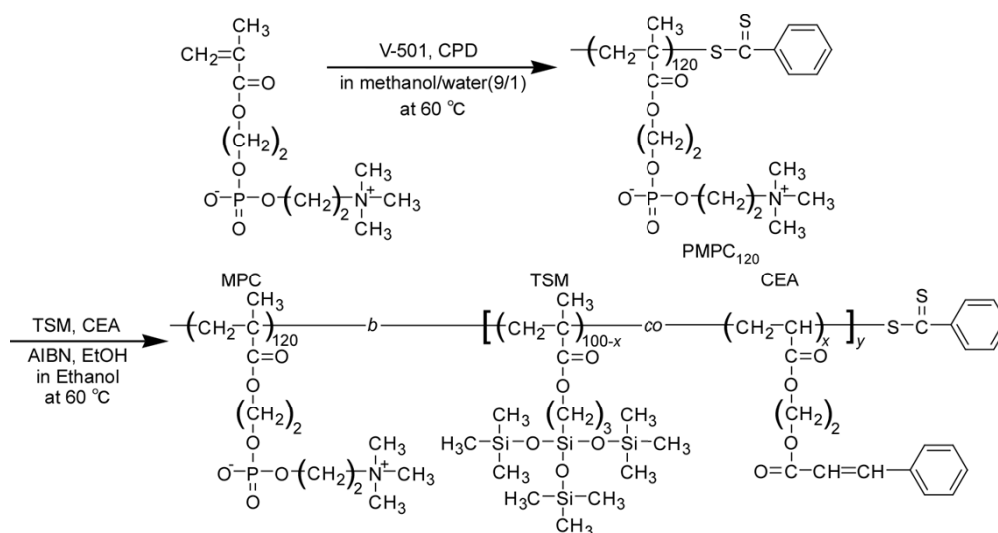

**Fig. S1** Synthetic route of PMPC<sub>120</sub>-P(TSM/CEA<sub>x</sub>)<sub>y</sub>.

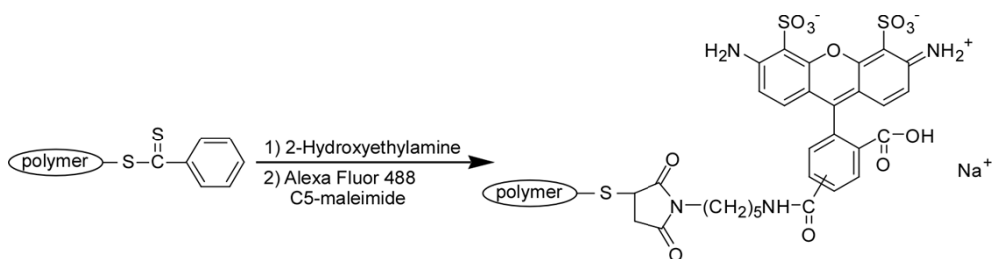

**Fig. S2** Fluorescence labelling of the end group of the polymers.

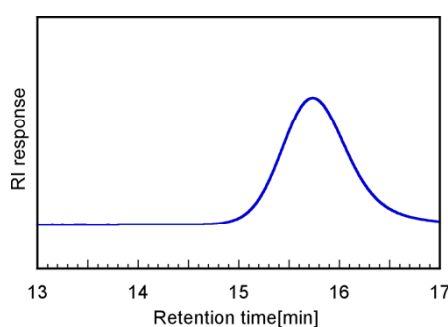

**Fig. S3** GPC elution curve for PMPC<sub>120</sub> using a mixed solution of phosphate buffer (pH 9) and acetonitrile (9/1, v/v) as an eluent.

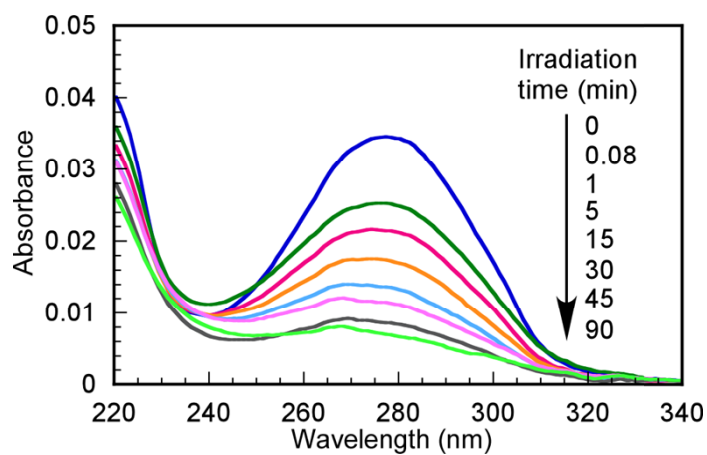

**Fig. S4** Changes in UV-Vis adsorption spectra of PMPC<sub>120</sub>-P(TSM/CEA10)<sub>58</sub> film prepared on a quartz glass substrate upon UV irradiation (time indicated in the figure).

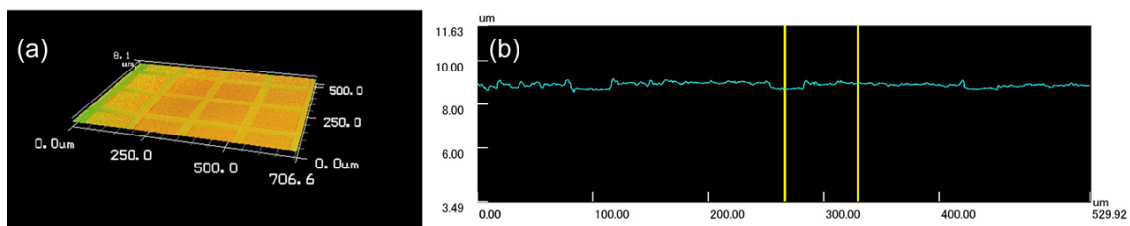

**Fig. S5** Laser micrograph of (a)  $\text{PMPC}_{120}\text{-P(TSM/CEA10)}_{58}$  coated on a PDMS substrate and (b) film thickness measurement.

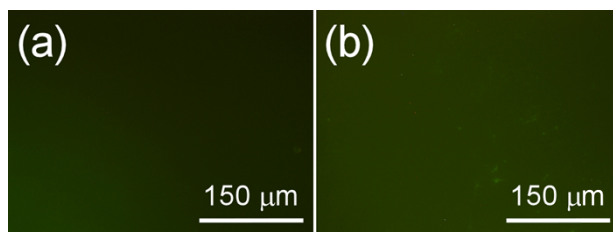

**Fig. S6** Fluorescence micrographs of (a)  $\text{PMPC}_{120}\text{F}$  and (b)  $\text{PMPC}_{120}\text{-TSM}_{68}\text{F}$  coated on a PDMS substrate.

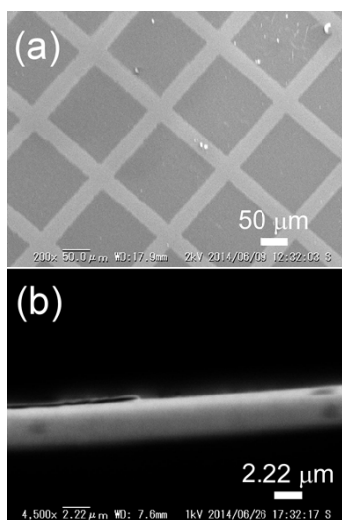

**Fig. S7** SEM images of (a)  $\text{PMPC}_{120}\text{-P(TSM/CEA10)}_{58}$  lattice pattern on PDMS substrate and (b) its cross section.

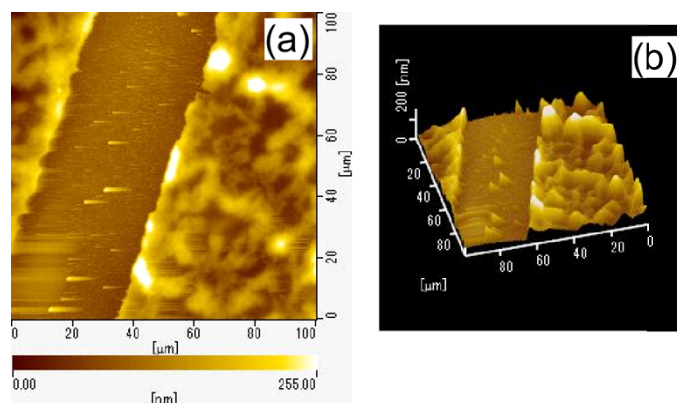

**Fig. S8** Representative AFM height (a) and topographical (b) images of PMPC<sub>120</sub>-P(TSM/CEA10)<sub>58</sub> coated on a PDMS substrate.

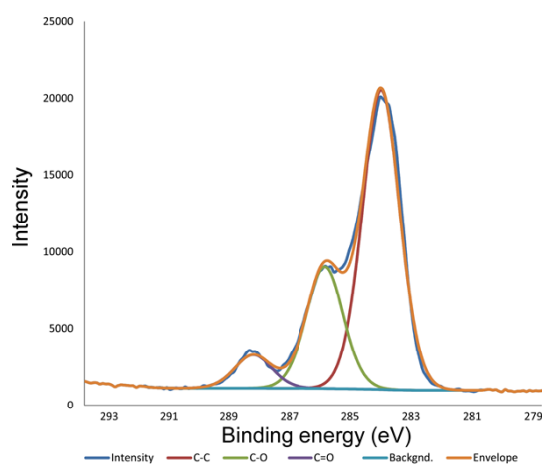

**Fig. S9** XPS spectrum of C<sub>1s</sub> for PMPC<sub>120</sub>-P(TSM/CEA10)<sub>58</sub> coated on a PDMS substrate.

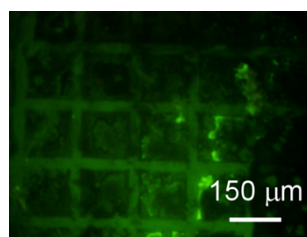

**Fig. S10** Fluorescence micrograph of PMPC<sub>120</sub>-P(TSM/CEA9)<sub>26</sub> coated on a PDMS substrate after soaking in an aqueous 488-BSA solution.

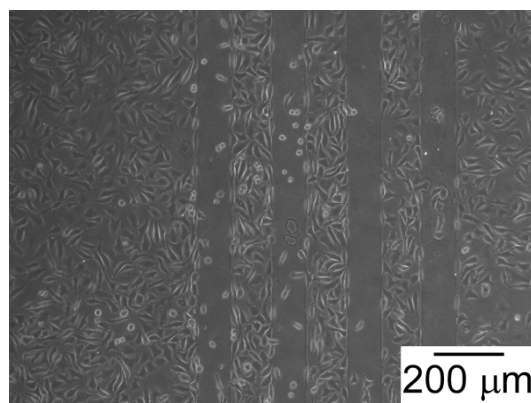

**Fig. S11** Typical behavior of L929 cells on a slit PMPC-patterned PDMS substrate.
